# Supplementary material
Source: HighWire-hosted journal article supplement (https://bmjopenquality.bmj.com/highwire/filestream/136072/field_highwire_adjunct_files/0/ds3365.docx)
Supplement: ds3365.docx [file ds3365.docx]

| **NRT TYPE** | **REFERRED PATIENTS** | **COST (£)** | **NOT REFERRED PATIENTS** | **COST (£)** |
| --- | --- | --- | --- | --- |
| **PATCH** | 431 | 3,620.40 | 568 | 4,771.20 |
| **INHALATOR** | 176 | 2,324.96 | 149 | 1,968.29 |
| **GUM** | 36 | 308.88 | 24 | 205.92 |
| **LOZENGES** | 16 | 178.08 | 9 | 100.17 |
| **MINI LOZENGES** | 11 | 15.73 | 3 | 4.29 |
| **NASAL SPRAY** | 22 | 309.54 | 11 | 154.77 |
|  |  |  |  |  |
| **TOTALS** | 692 | 6,757.59 | 764 | 7,204.64 |
